# Supplementary material for: Almond By-Products Substrates as Sustainable Amendments for Green Bean Cultivation
Source: MDPI journal article supplement (doi:10.3390/plants13040540), 2024-02-16
Supplement: s1 [file s1]

**Table S1.** Pearson Correlation matrix between biochemical parameters of pods resulting from green beans grown in four distinct substrates, irrigated at 100% and 50% of WFC.

| Variables          | Chl a          | Chl b          | Total Chl      | Chl (a/b) | Total Carot.    | Total (Chl/Carot.) | Phenolics      | Ortho-diphenols | Flavonoids     | AC-DPPH        | AC-ABTS | Proteins |
|--------------------|----------------|----------------|----------------|-----------|-----------------|--------------------|----------------|-----------------|----------------|----------------|---------|----------|
| Chl a              | 1              |                |                |           |                 |                    |                |                 |                |                |         |          |
| Chl b              | <b>0.456*</b>  | 1              |                |           |                 |                    |                |                 |                |                |         |          |
| Total Chl          | <b>0.916**</b> | <b>0.776**</b> | 1              |           |                 |                    |                |                 |                |                |         |          |
| Chl (a/b)          | <b>0.885**</b> | -0.008         | <b>0.624**</b> | 1         |                 |                    |                |                 |                |                |         |          |
| Total Carot.       | -0.031         | -0.040         | -0.040         | -0.017    | 1               |                    |                |                 |                |                |         |          |
| Total (Chl/Carot.) | 0.241          | 0.271          | 0.294          | 0.138     | <b>-0.930**</b> | 1                  |                |                 |                |                |         |          |
| Phenolics          | -0.100         | 0.224          | 0.030          | -0.234    | 0.015           | 0.113              | 1              |                 |                |                |         |          |
| Ortho-diphenols    | 0.044          | <b>0.425*</b>  | 0.223          | -0.168    | <b>0.411*</b>   | -0.255             | <b>0.577**</b> | 1               |                |                |         |          |
| Flavonoids         | -0.231         | 0.183          | -0.082         | -0.333    | <b>0.420*</b>   | -0.278             | <b>0.427*</b>  | <b>0.714**</b>  | 1              |                |         |          |
| AC-DPPH            | -0.212         | 0.214          | -0.053         | -0.319    | 0.367           | -0.241             | <b>0.426*</b>  | <b>0.582**</b>  | <b>0.732**</b> | 1              |         |          |
| AC-ABTS            | -0.234         | -0.216         | -0.263         | -0.155    | <b>0.805**</b>  | <b>-0.895**</b>    | -0.191         | 0.155           | 0.146          | 0.249          | 1       |          |
| Proteins           | 0.200          | <b>0.532**</b> | 0.382          | -0.057    | 0.336           | -0.176             | <b>0.549**</b> | <b>0.835**</b>  | <b>0.566**</b> | <b>0.582**</b> | 0.144   | 1        |

\*. The correlation is significant at the 0.05 level (2 ends).

\*\*. The correlation is significant at the 0.01 level (2 ends).

Bold values indicate very strong and strong correlations between variables. Abbreviations: Chl a – chlorophyll *a*, Chl b – chlorophyll *b*, Chl (a/b) – chlorophyll (*a/b*) ratio, Total Chl – total chlorophyll (*a+b*), Total Carot. – total carotenoids, Total (Chl/Carot.) – total (Chl/Carot.) ratio, AC-ABTS – antioxidant activity by ABTS method, AC-DHHP – antioxidant activity by DPPH method.
